# Supplementary material for: Increased Enzyme Loading in PICsomes via Controlling Membrane Permeability Improves Enzyme Prodrug Cancer Therapy Outcome
Source: MDPI journal article supplement (doi:10.3390/polym15061368), 2023-03-09
Supplement: s1 [file s1]

Supplementary

# Increased Enzyme Loading in PICsomes via Controlling Membrane Permeability Improves Enzyme Prodrug Cancer Therapy Outcome

Akinori Goto <sup>1</sup>, Yasutaka Anraku <sup>2,3</sup>, Shigeto Fukushima <sup>3</sup> and Akihiro Kishimura <sup>4,5,\*</sup>

<sup>1</sup> Kyorin Pharmaceutical Co., Ltd., Watarase Research Center, 1848, Nogi, Nogi-machi, Shimotsuga-gun, Tochigi 329-0114, Japan

<sup>2</sup> Department of Bioengineering, Graduate School of Engineering, University of Tokyo, Hongo, Bunkyo-ku, Tokyo 113-8656, Japan

<sup>3</sup> Innovation Center of NanoMedicine, Kawasaki Institute of Industrial Promotion, 3-25-14 Tonomachi, Kawasaki-ku, Kawasaki 210-0821, Japan

<sup>4</sup> Department of Applied Chemistry, Faculty of Engineering, Kyushu University, 744 Moto-oka, Nishi-ku, Fukuoka 819-0395, Japan

<sup>5</sup> Center for Molecular Systems, Kyushu University, 744 Moto-oka, Nishi-ku, Fukuoka 819-0395, Japan

\* Correspondence: kishimura.akihiro.776@m.kyushu-u.ac.jp; Tel.: +81-92-802-2851

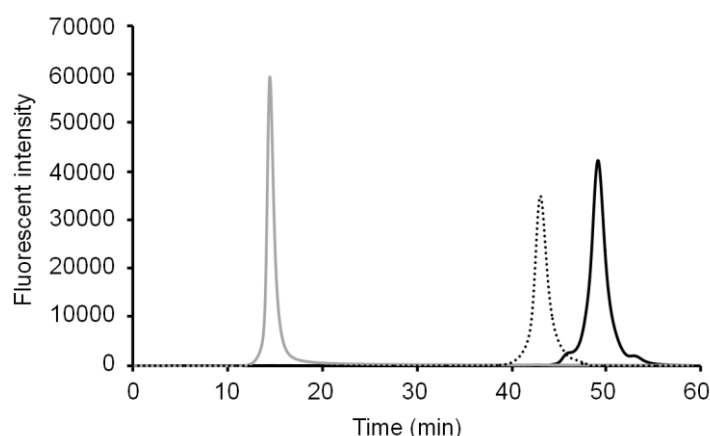

**Figure S1.** GPC chromatograms of Cy5-CD (dotted line), crosslinked Cy5-PICsome (gray line) and Cy5 (solid line).

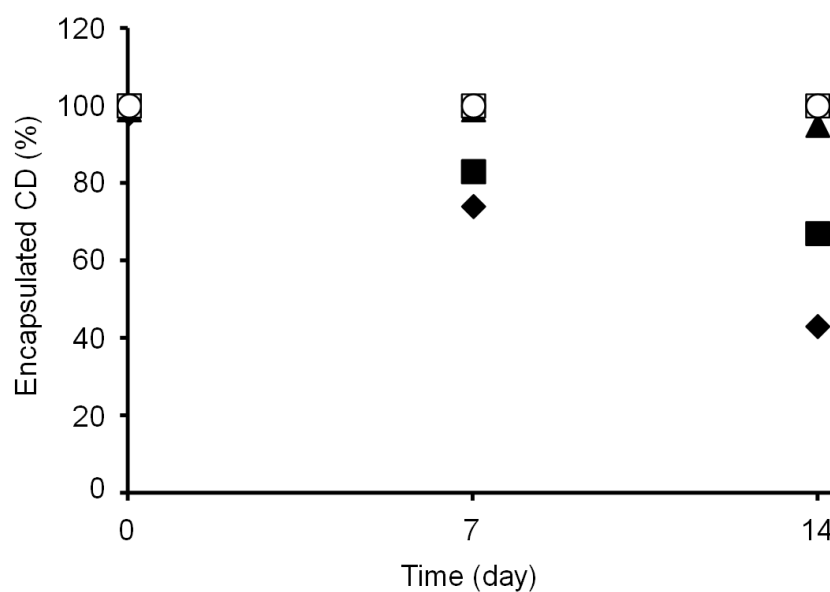

**Figure S2.** Cy5-CD leaking from the PICsome after the 2<sup>nd</sup> crosslinking. Second crosslinking was performed using a different concentration of EDC solutions (○: 50 mg/mL, □: 9.0 mg/mL, ▲: 5.0 mg/mL, ■: 3.0 mg/mL, and ◆: 1.0 mg/mL).

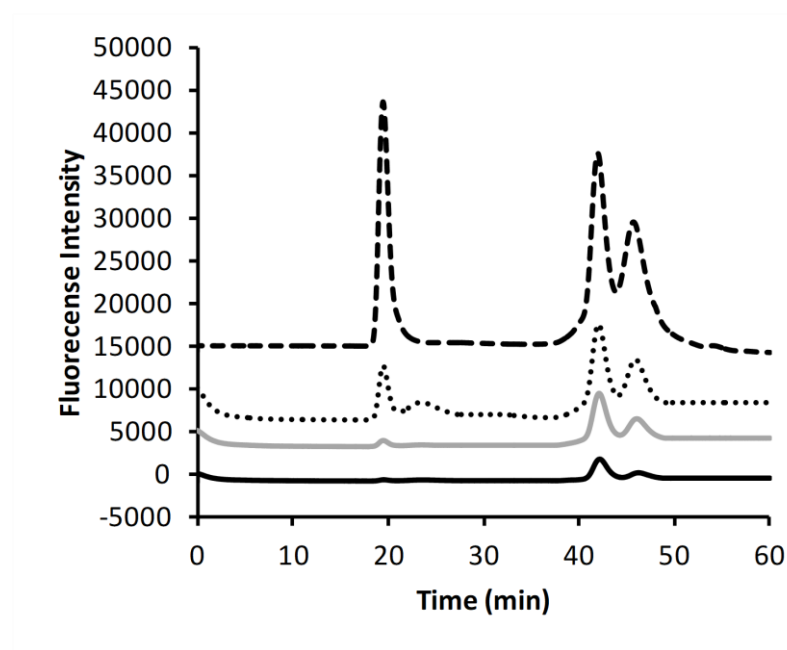

**Figure S3.** GPC chromatograms of the reaction mixture after the vortex-driven loading and 2<sup>nd</sup> crosslinking treatment obtained at various concentrations of Cy5-CD: 10 mg/mL (black dotted line), 5.0 mg/mL (gray dotted line), 2.5 mg/mL (gray solid line), and 1.0 mg/mL (black solid line).

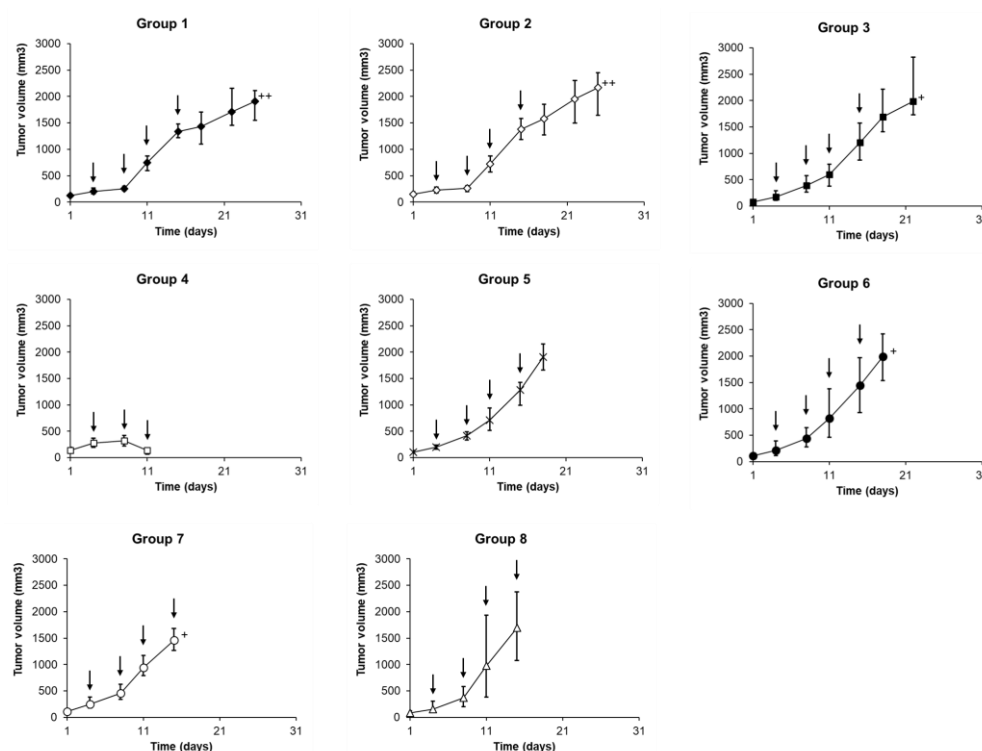

**Figure S4.** The tumor volume change in C26-bearing mice (n=5) treated with CD@PICsome and 10 mg/kg of 5-FC (◆, group 1), CD@PICsome and 80 mg/kg of 5-FC (◇, group 2), 10 mg/kg of 5-FU (■, group 3), 80 mg/kg of 5-FU (□, group 4) CD@PICsome alone (×, group 5), 10 mg/kg of 5-FC (●, group 6), 80 mg/kg of 5-FC (○, group 7) and 10 mM PBS (pH 6.8) (△, group 8). An arrow indicates administration day of 5-FU or 5-FC or 10 mM PBS (pH 6.8). ++: n=3, +: n=4.

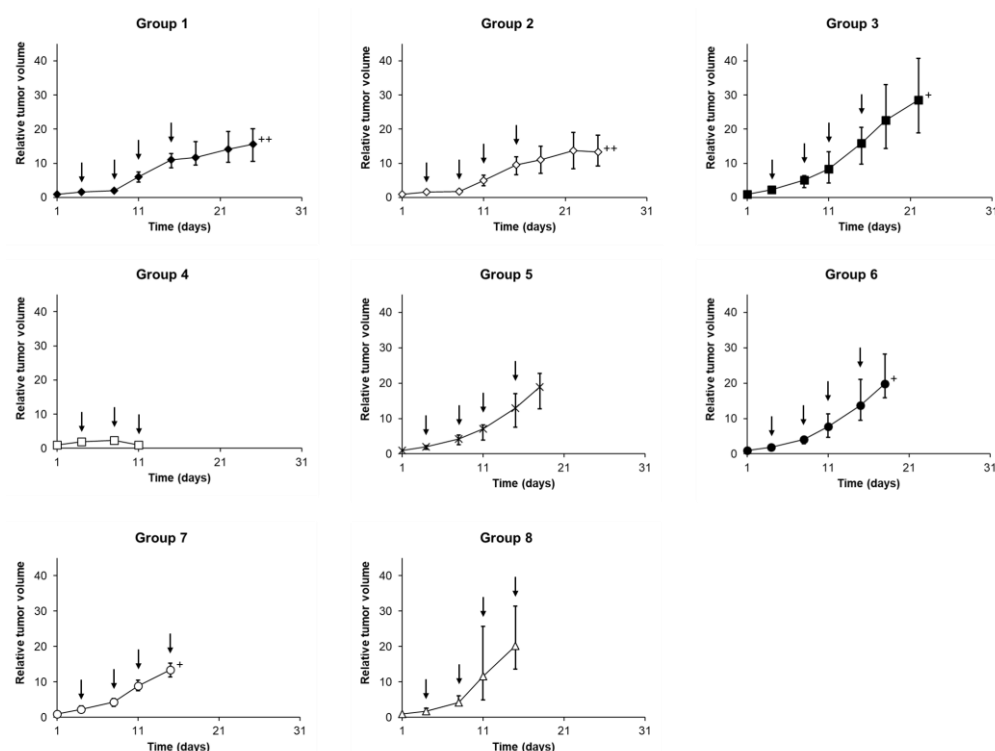

**Figure S5.** The relative tumor volume change in C26-bearing mice (n=5) treated with CD@PICsome and 10 mg/kg of 5-FU (◆, group 1), CD@PICsome and 80 mg/kg of 5-FU (◇, group 2), 10 mg/kg of 5-FU (■, group 3), 80 mg/kg of 5-FU (□, group 4) CD@PICsome alone (×, group 5), 10 mg/kg of 5-FU (●, group 6), 80 mg/kg of 5-FU (○, group 7) and 10 mM PBS (pH 6.8) (Δ, group 8). An arrow indicates administration day of 5-FU or 5-FU or 10 mM PBS (pH 6.8). ++: n=3, +: n=4.

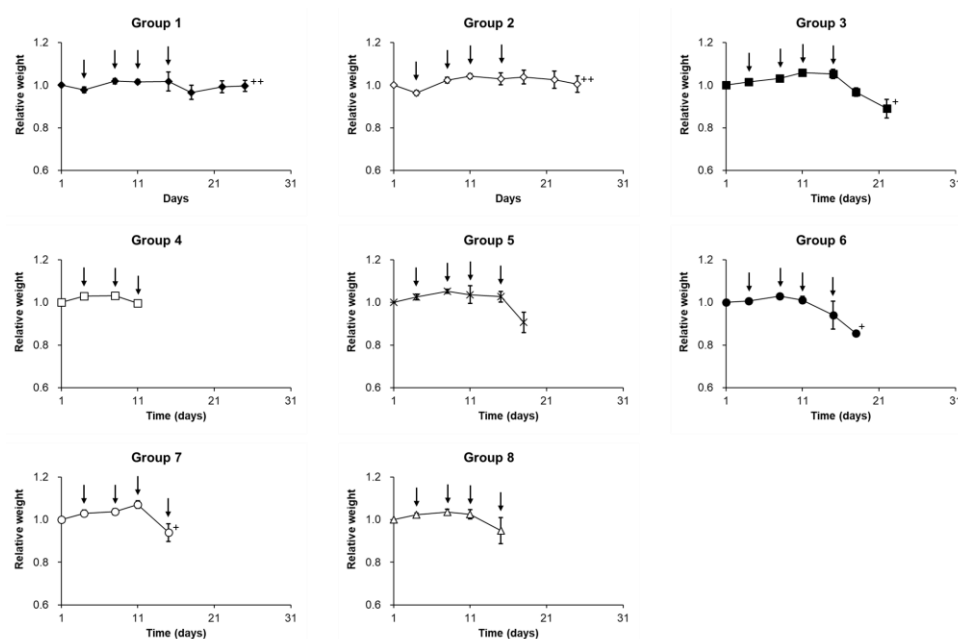

**Figure S6.** The weight change of mice (n=5) treated with CD@PICsome and 10 mg/kg of 5-FU (◆, group 1), CD@PICsome and 80 mg/kg of 5-FU (◇, group 2), 10 mg/kg of 5-FU (■, group 3), 80 mg/kg of 5-FU (□, group 4) CD@PICsome alone (×, group 5), 10 mg/kg of 5-FU (●, group 6), 80 mg/kg of 5-FU (○, group 7) and 10 mM PBS (pH 6.8) (Δ, group 8). An arrow indicates administration day of 5-FU or 5-FU or 10 mM PBS (pH 6.8). ++: n=3, +: n=4.
